# Supplementary material for: Cistanche Tubulosa Phenylethanoid Glycosides Induce Apoptosis of Hepatocellular Carcinoma Cells by Mitochondria-Dependent and MAPK&nbsp;Pathways and Enhance Antitumor Effect Through Combination With Cisplatin
Source: Research Square preprint supplement (doi:10.21203/rs.3.rs-136218/v1), 2021-01-05
Supplement: Supplementary file 1 [file 978149bcea824ecf3270e6c3.docx]

***Cistanche tubulosa* phenylethanoid glycosides induce apoptosis of hepatocellular carcinoma cells by mitochondria-dependent and MAPK pathways and enhance antitumor effect through combination with cisplatin**

Pengfei Yuan, Changshuang Fu, Yi Yang, Aipire Adila, Fangfang Zhou, Xianxian Wei, Weilan Wang, Jie Lv, Yijie Li, Lijie Xia*, Jinyao Li*

Xinjiang Key Laboratory of Biological Resources and Genetic Engineering, College of Life Science and Technology, Xinjiang University, Urumqi 830046, China

* Corresponding authors: J Li (e-mail: ljyxju@xju.edu.cn) and L Xia (xialijie1219@163.com)

**The western blots are used in figures as follows.**

**Figure 1D**. HepG2 cells were treated with 200. 400 and 600 μg/mL CTPG for 24 h, then proteins were isolated to detect MAPK signaling pathway proteins by Western blot. From left to right, CTPG treatment concentration was 0,200, 400 and 600 μg/mL. **

**
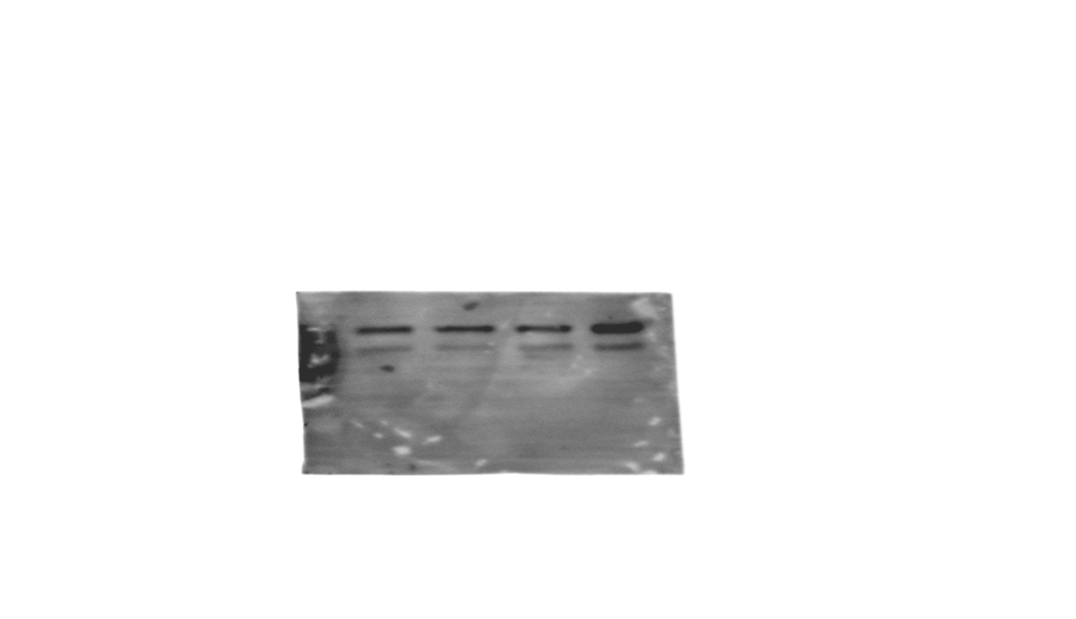




β-actin

JNK

P-JNK





p38





P-p38





ERK





P-ERK

HepG2 cells were treated with 600 μg/mL CTPG for 0, 0.5, 3, 6 and 12 h, then proteins were isolated to detect MAPK signaling pathway proteins by Western blot. From left to right, CTPG treatment for 0, 0.5, 3, 6 and 12 h.


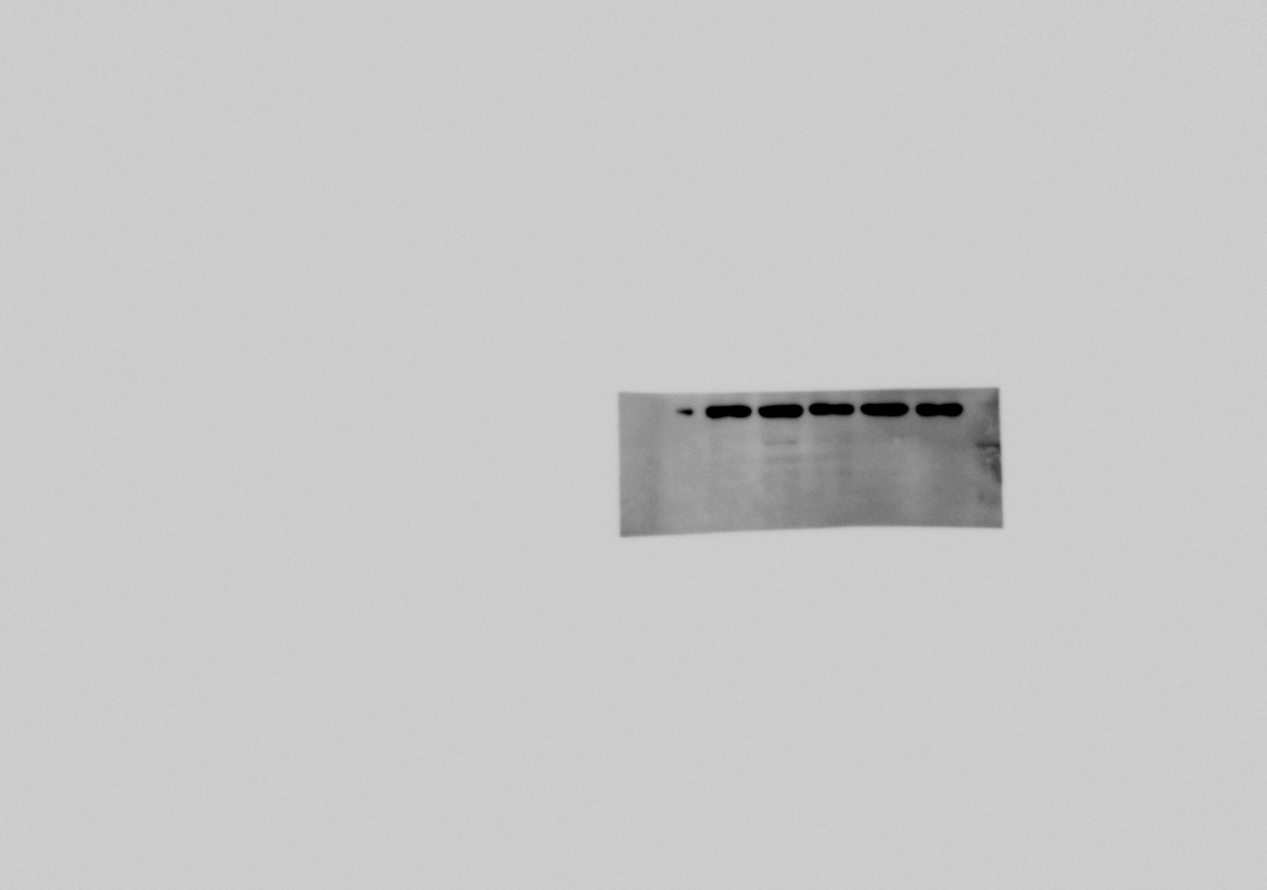


β-actin


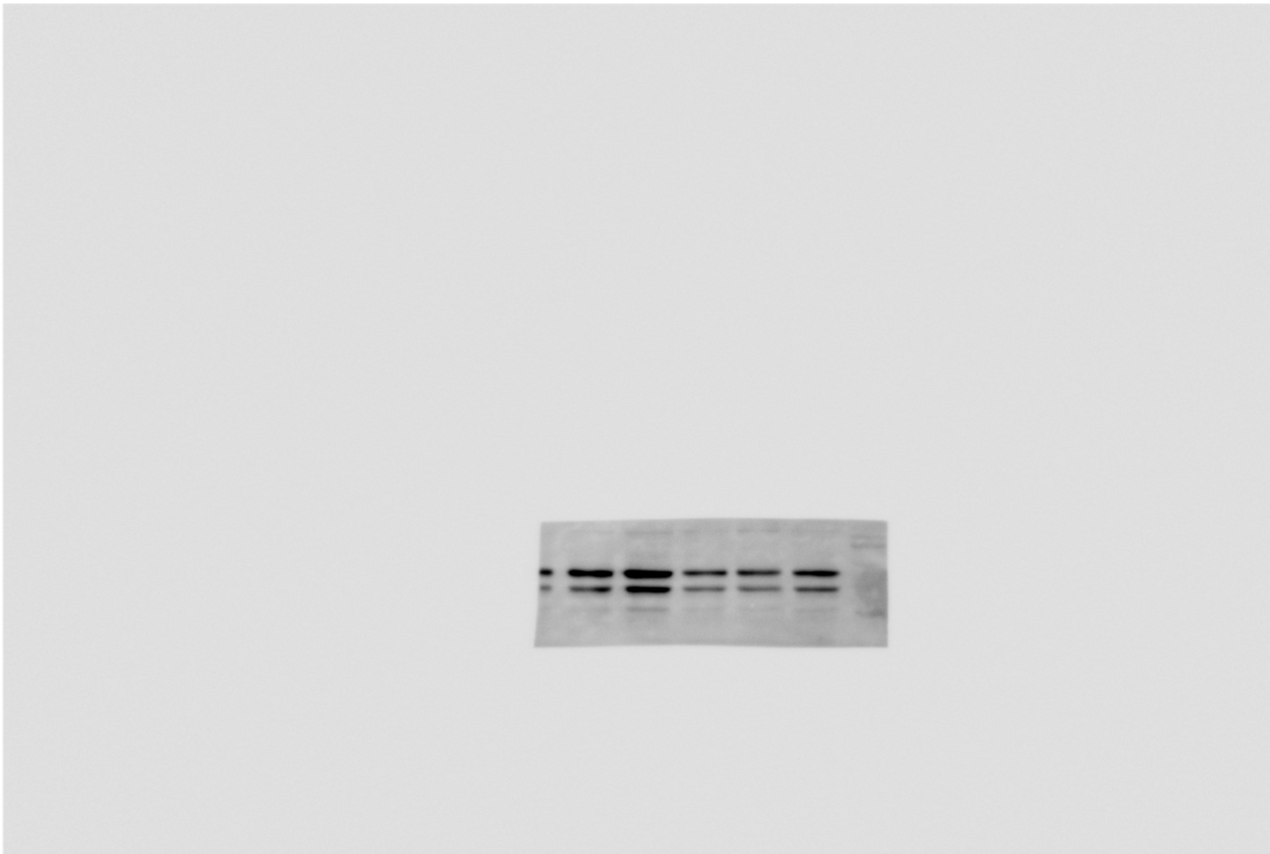


JNK





P-JNK


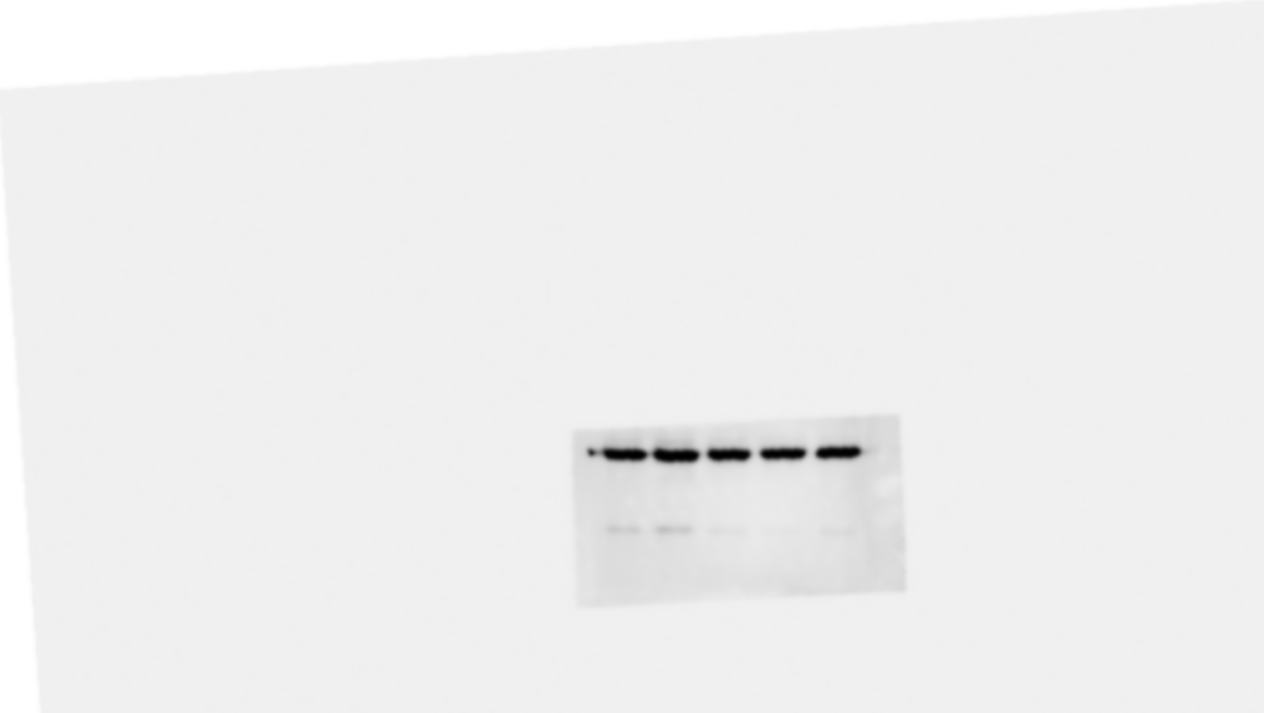


p38


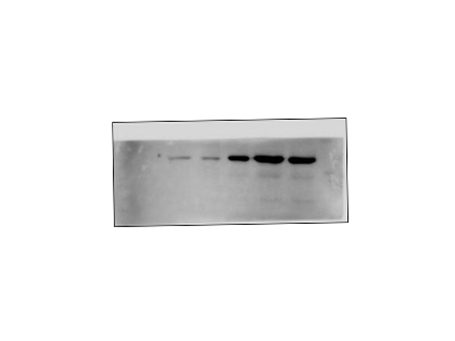


P-p38


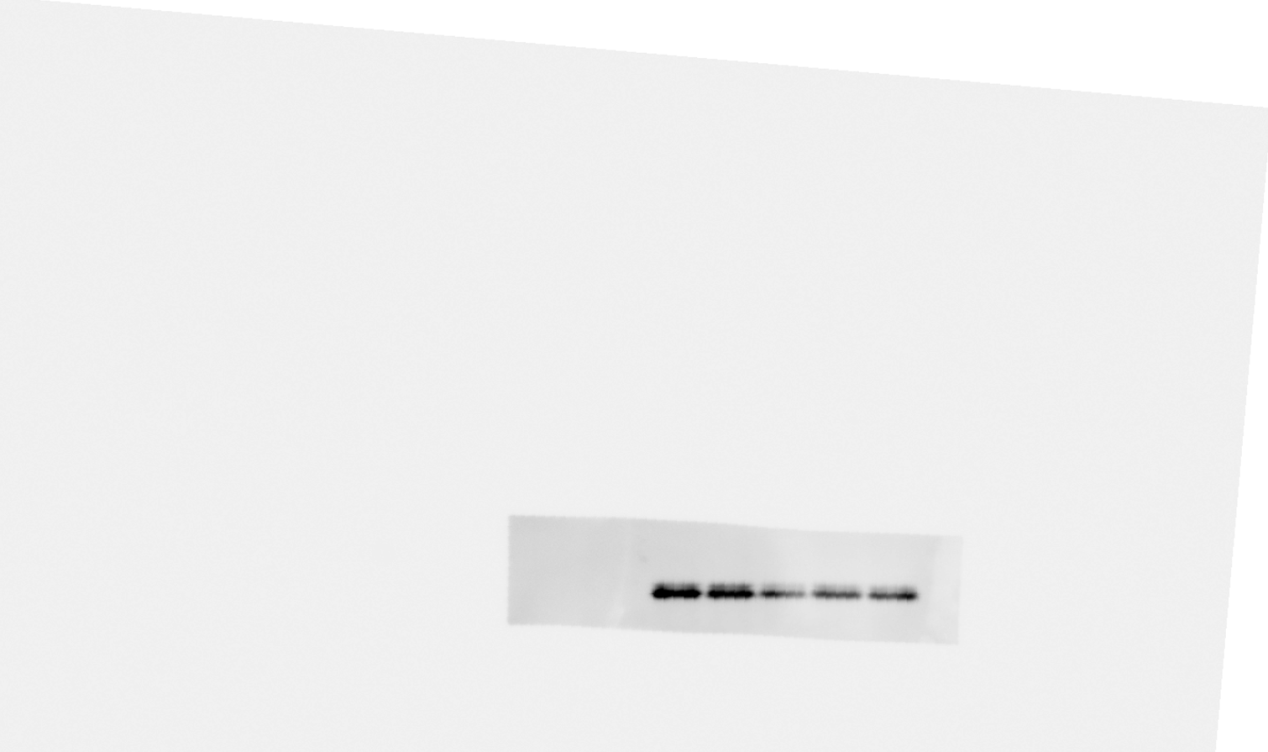


ERK


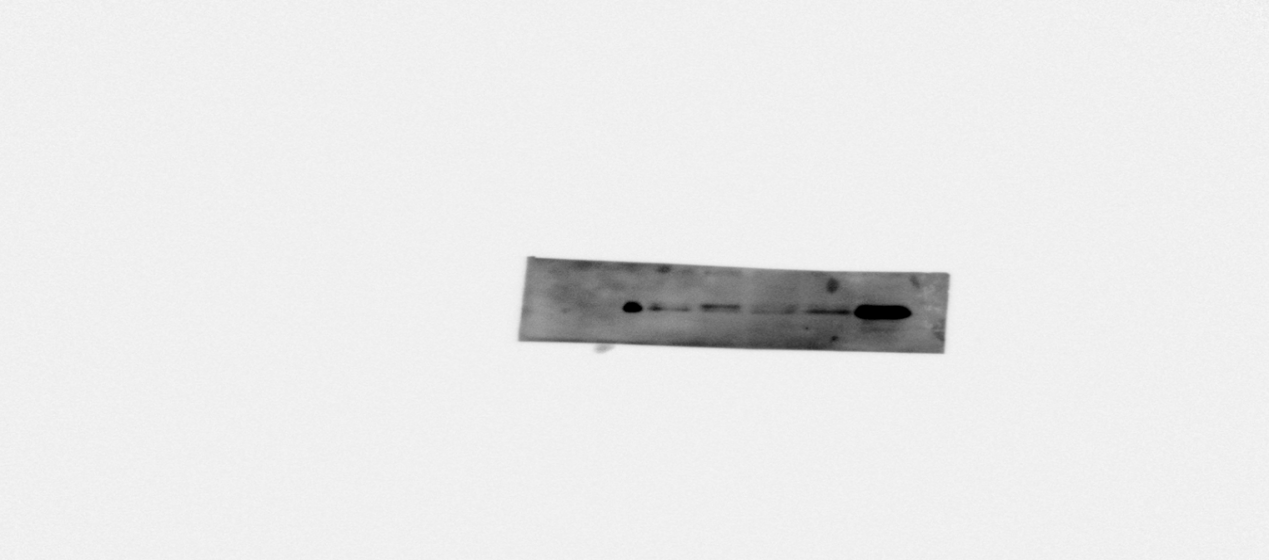


P-ERK

**Figure 2B.** HepG2 cells were treated with different concentration (0, 200, 400, 600 μg/mL) of CTPG for 24 h, and proteins were isolated to detect the levels of cyclinD1, CDK2, cyclinB1 and CDK1 by Western blot.

From left to right, HepG2 cells were treated with 0, 200, 400, 600 μg/mL.





β-actin


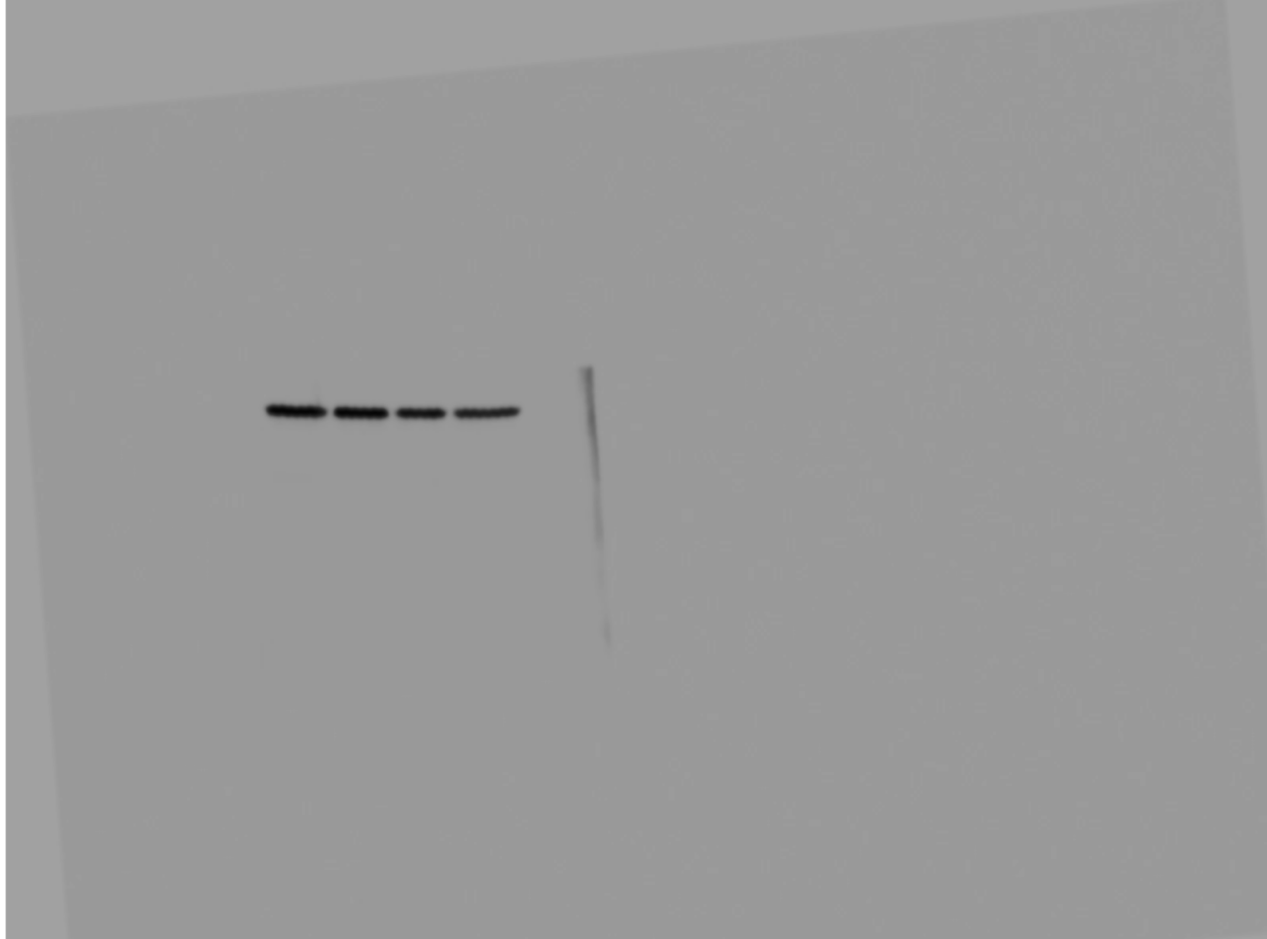


Cyclin D1


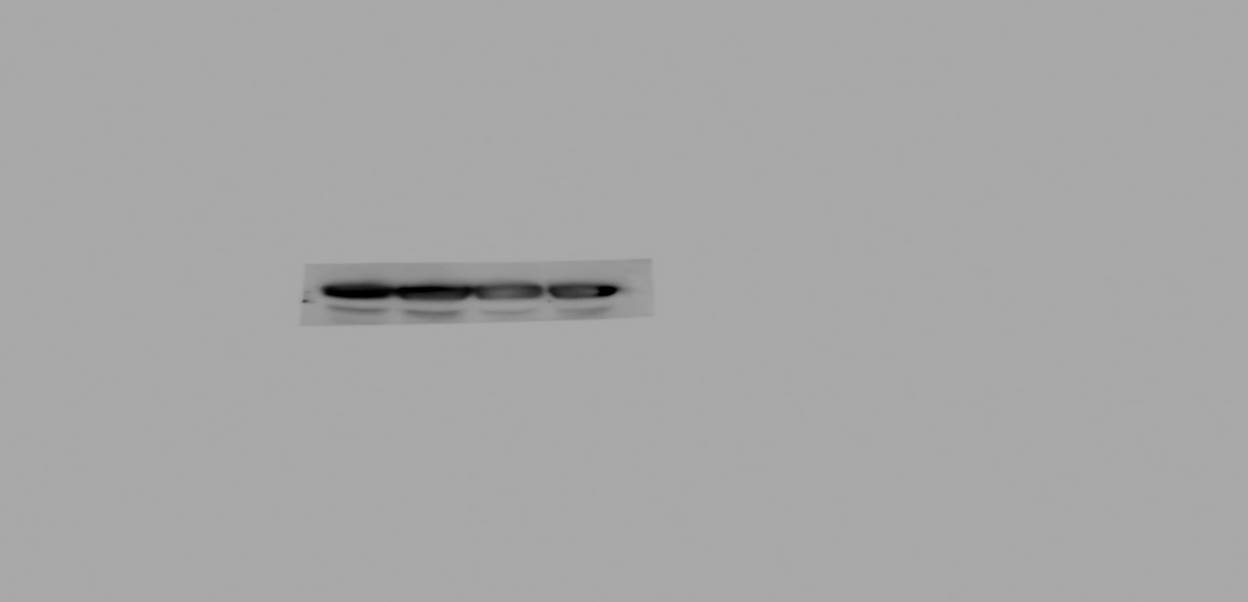


Cyclin B1


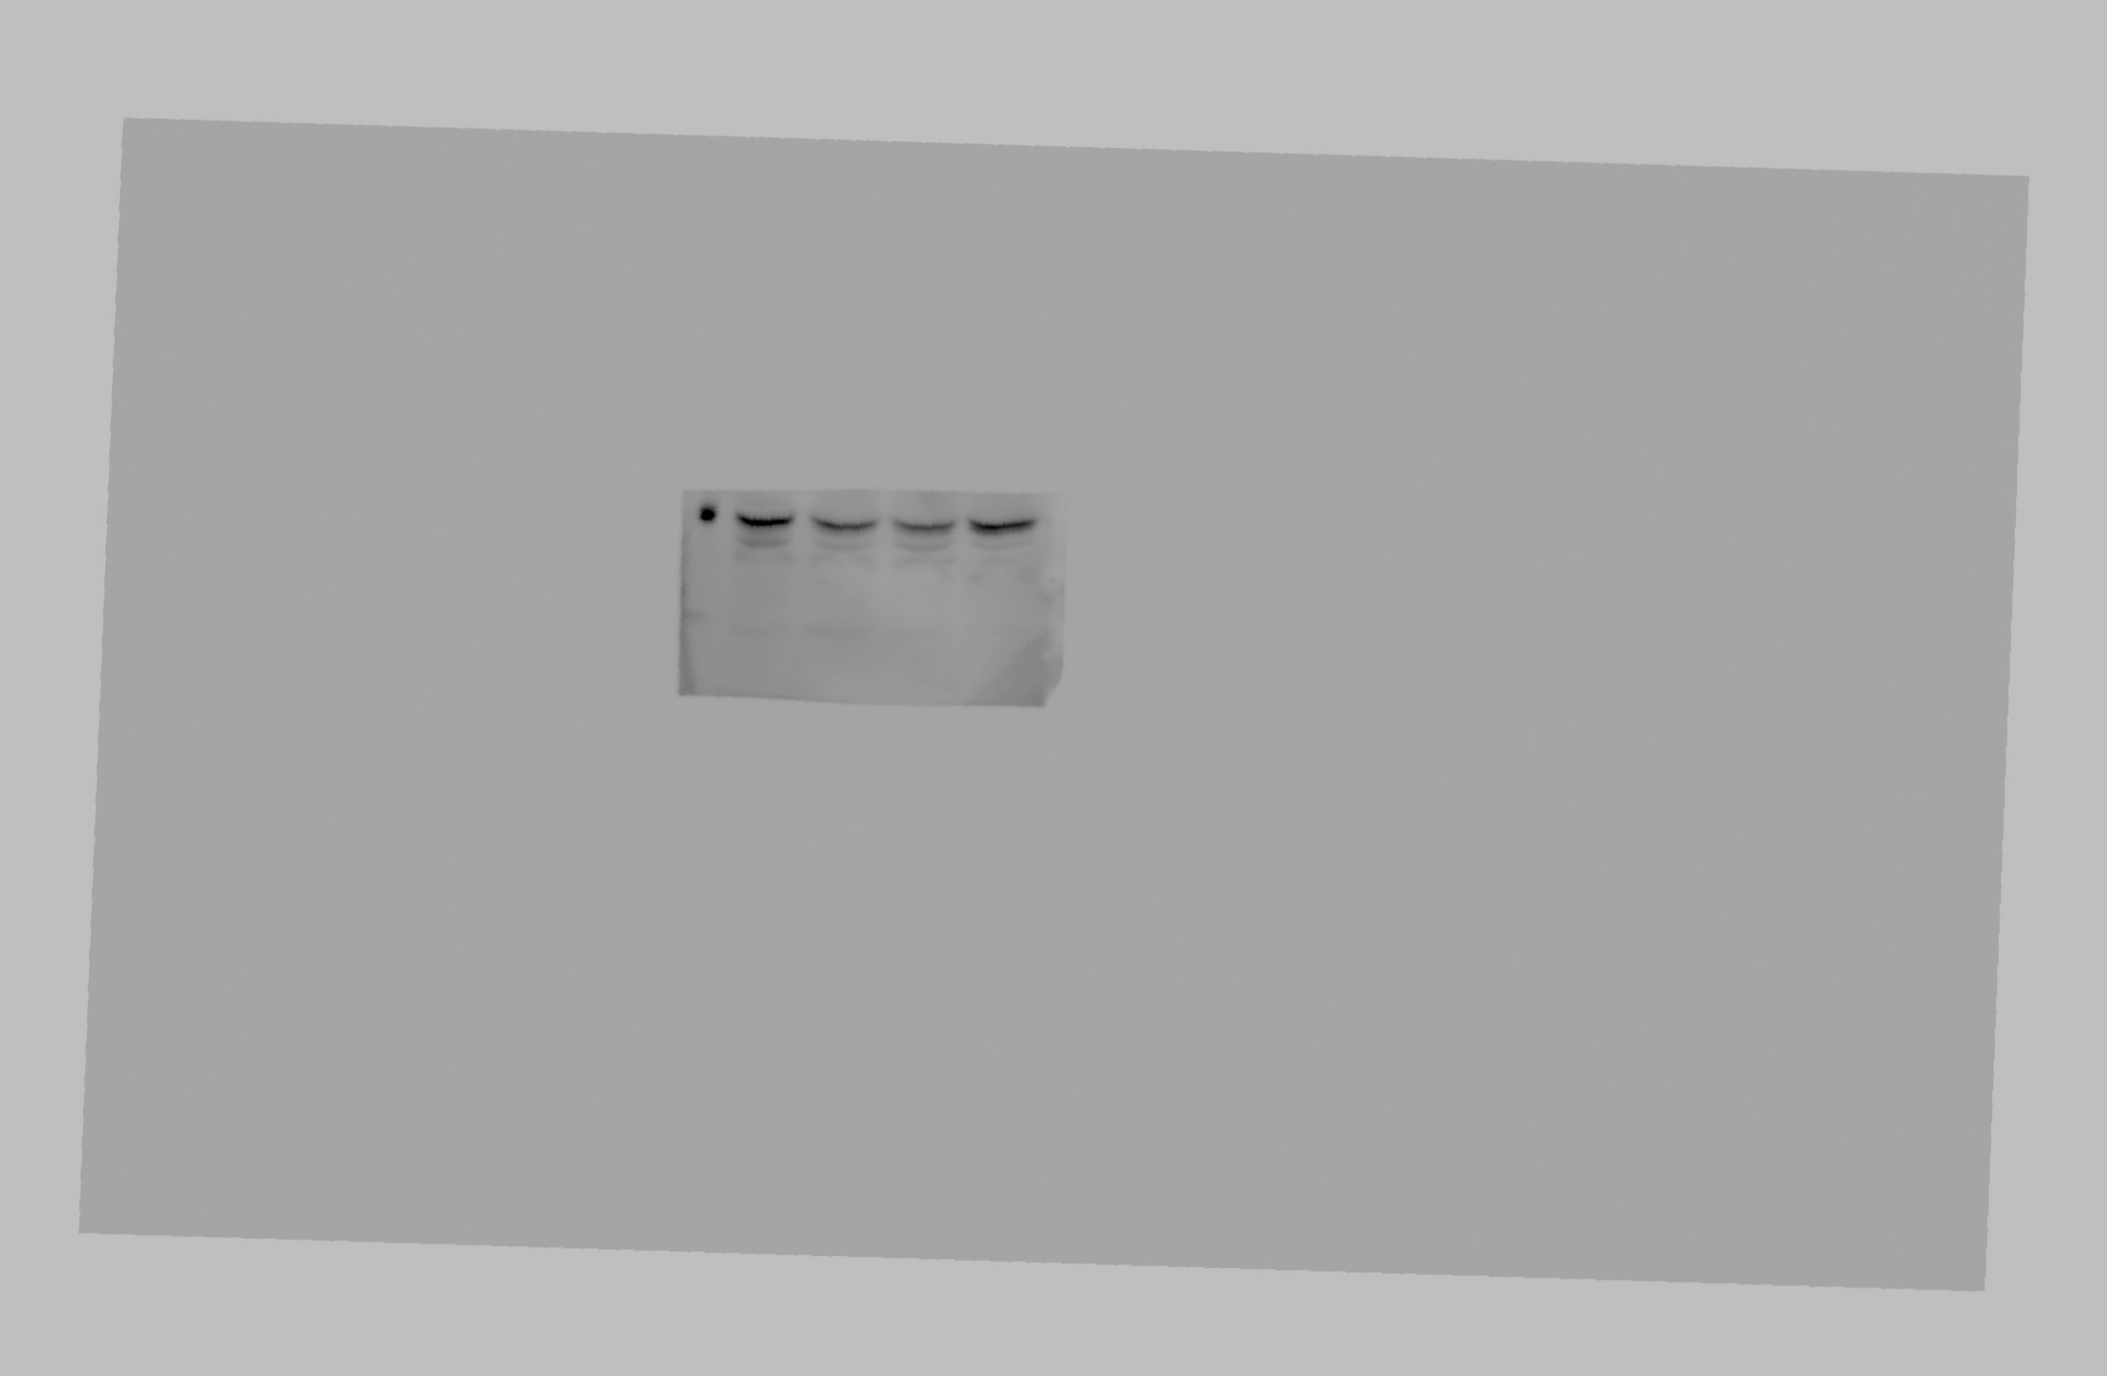


CDK1





CDK2

**Figure 3B.** BEL-7404 and HepG2 Cells were treated with different concentrations (0, 200, 400, 600 μg/mL) of CTPG for 24 h. Total protein was isolated to analyze the expressions of Bax and Bcl-2 by Western blot.

From left to right, BEL-7404 cells were treated with 0, 200, 400, 600 μg/mL.


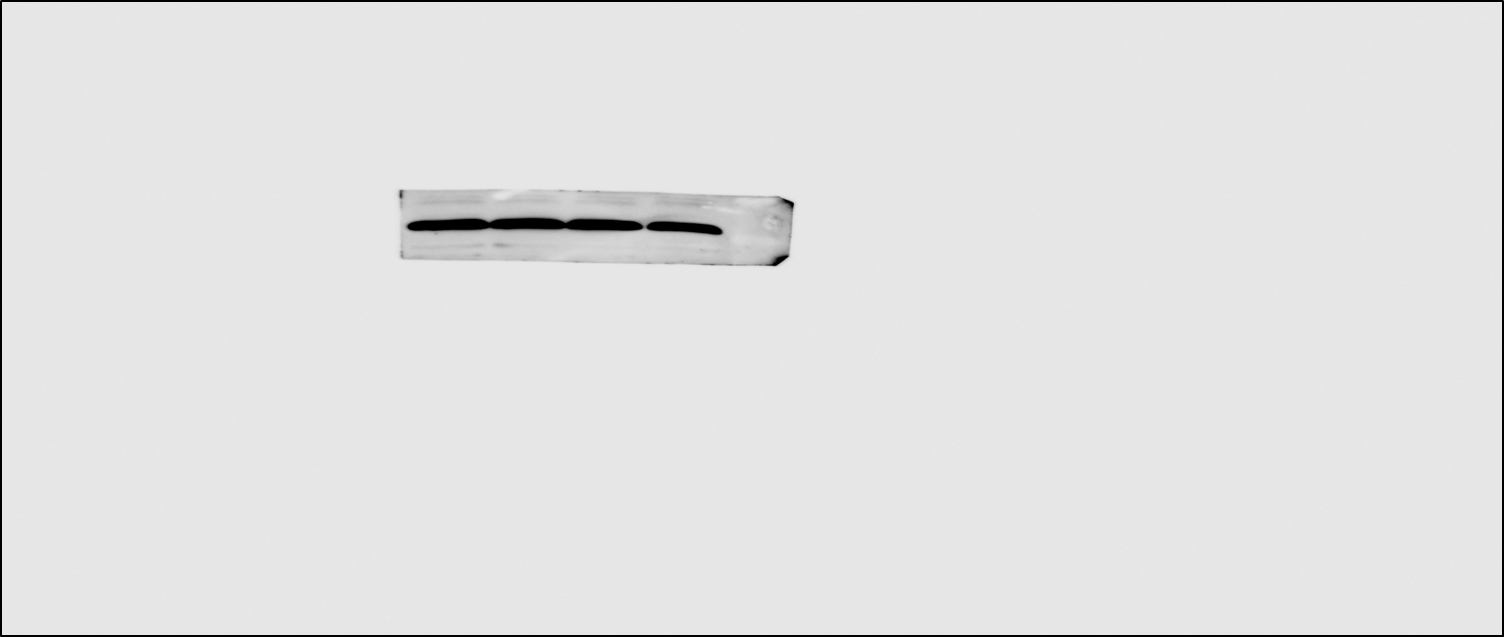


β-actin


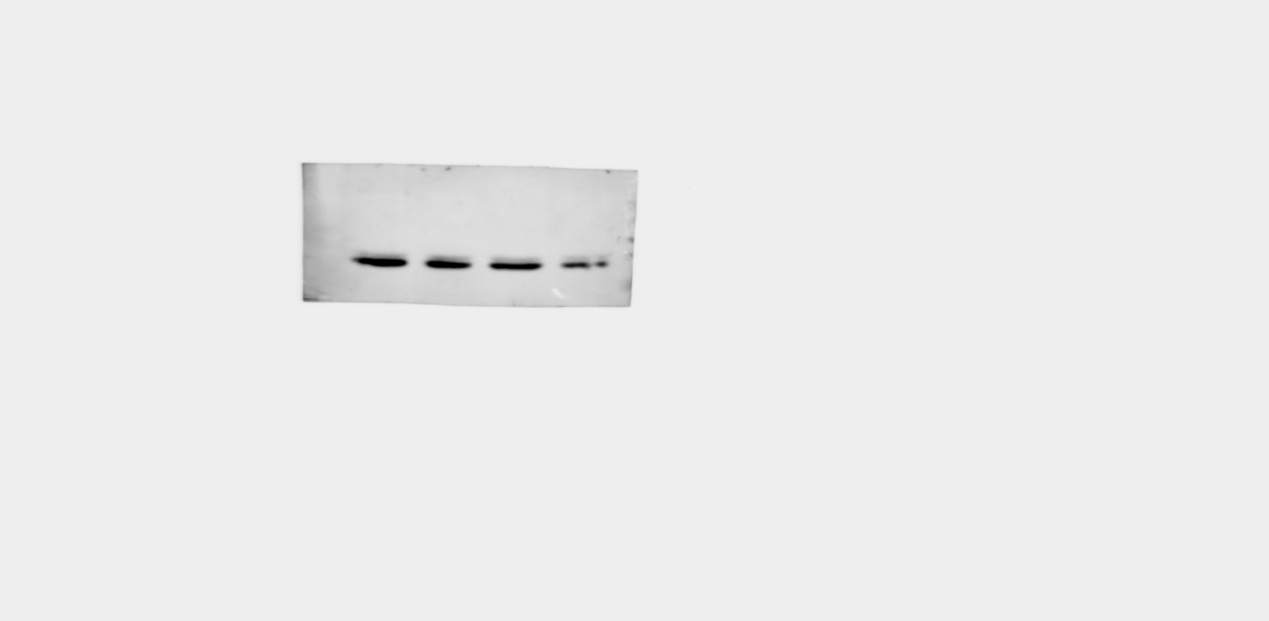


Bax

Bcl-2


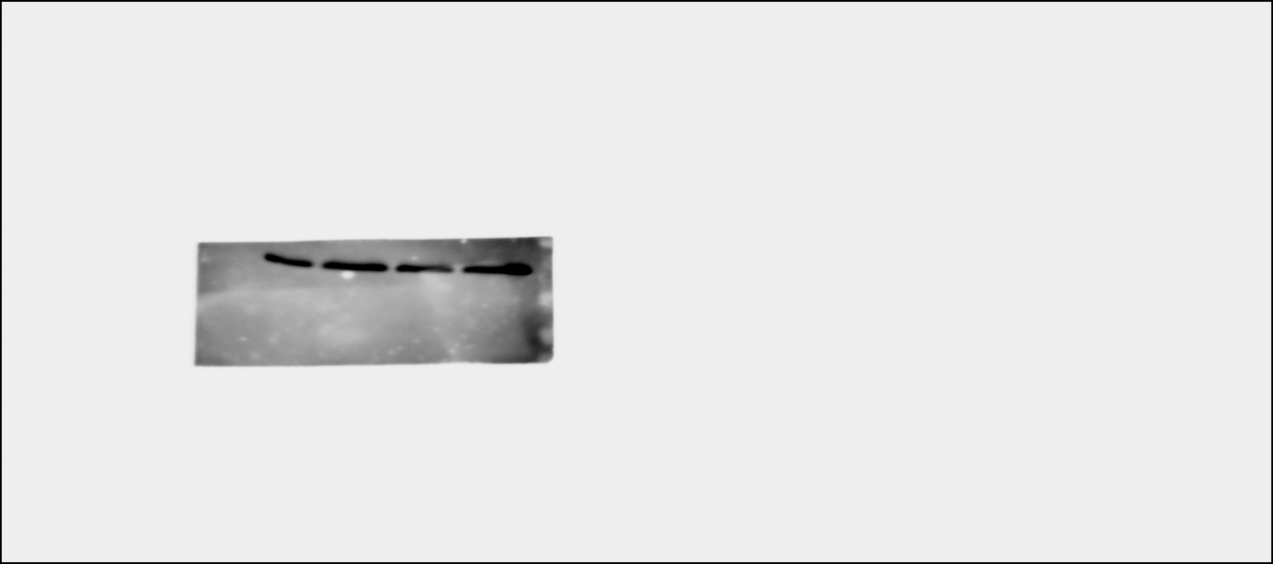


Bax

From left to right, HepG2 cells were treated with 0, 200, 400, 600 μg/mL.





β-actin


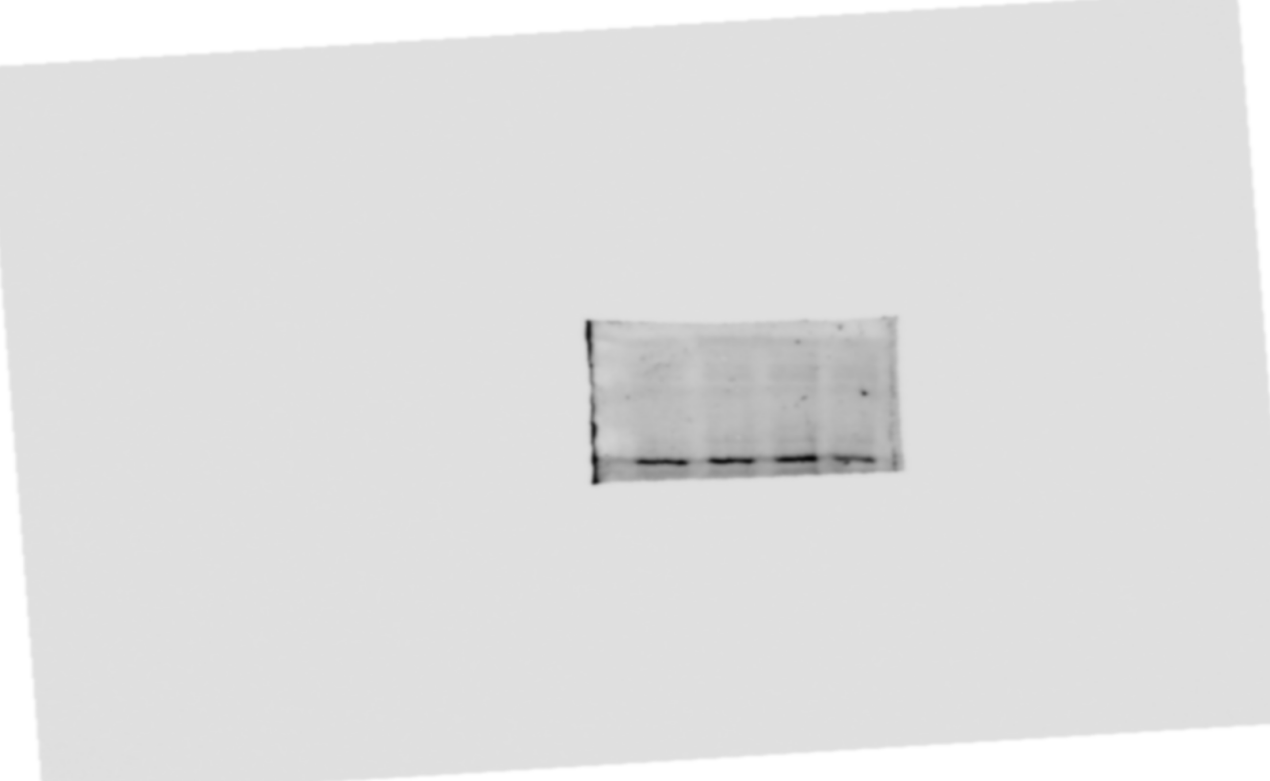


Bcl-2





Bax

**Figure 4C.** BEL-7404 and HepG2 cells were treated with different concentrations (0, 200, 400, 600 μg/mL) of CTPG. After 24 h, proteins were isolated and the levels of cytochrome *c* were detected by Western blot.

From left to right, BEL-7404 cells were treated with 0, 200, 400, 600 μg/mL.


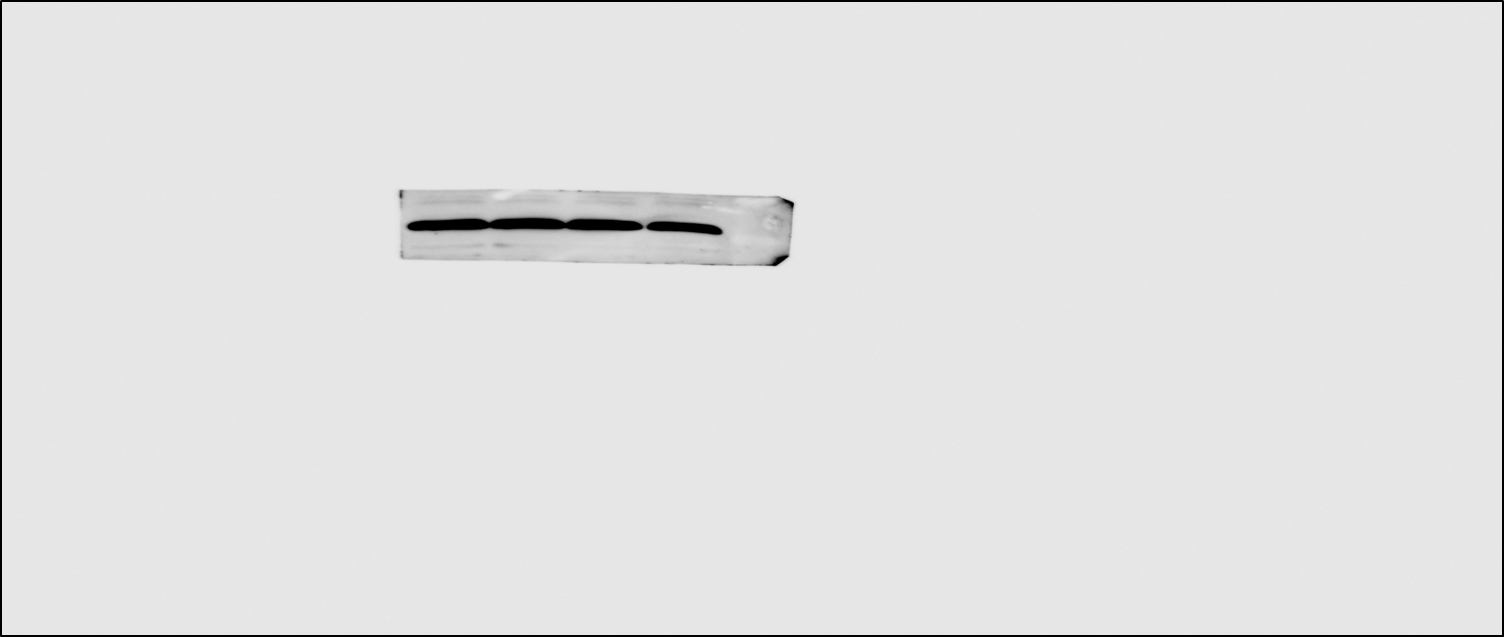


β-actin


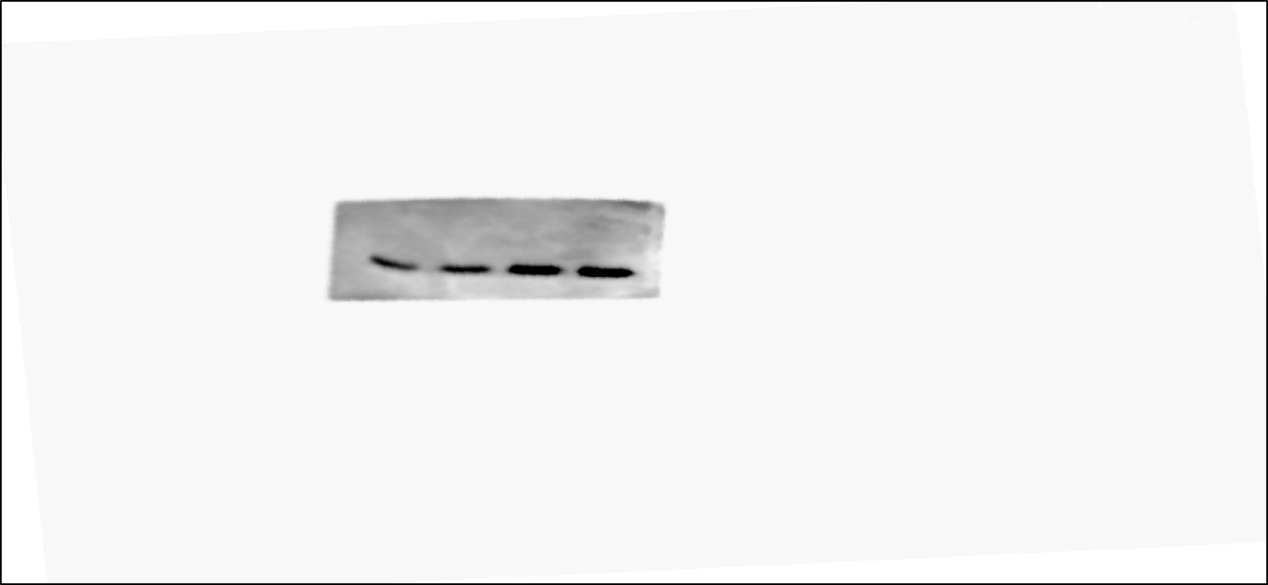


Cytochrome *c*

From left to right, HepG2 cells were treated with 0, 200, 400, 600 μg/mL.





β-actin


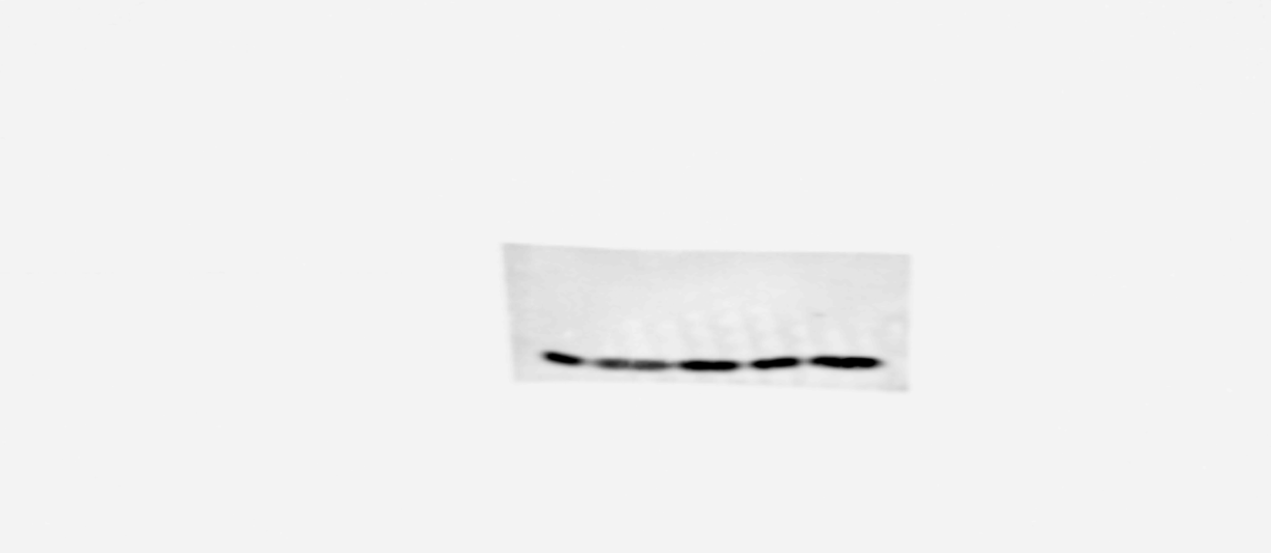


Cytochrome *c*

**Figure 5A.** BEL-7404 and HepG2 cells were treated with different concentrations (0, 200, 400, 600 μg/mL) of CTPG. After 24 h, proteins were isolated and the levels of cleaved-caspases and -PARP were detected by Western blot.

From left to right, BEL-7404 cells were treated with 0, 200, 400, 600 μg/mL.


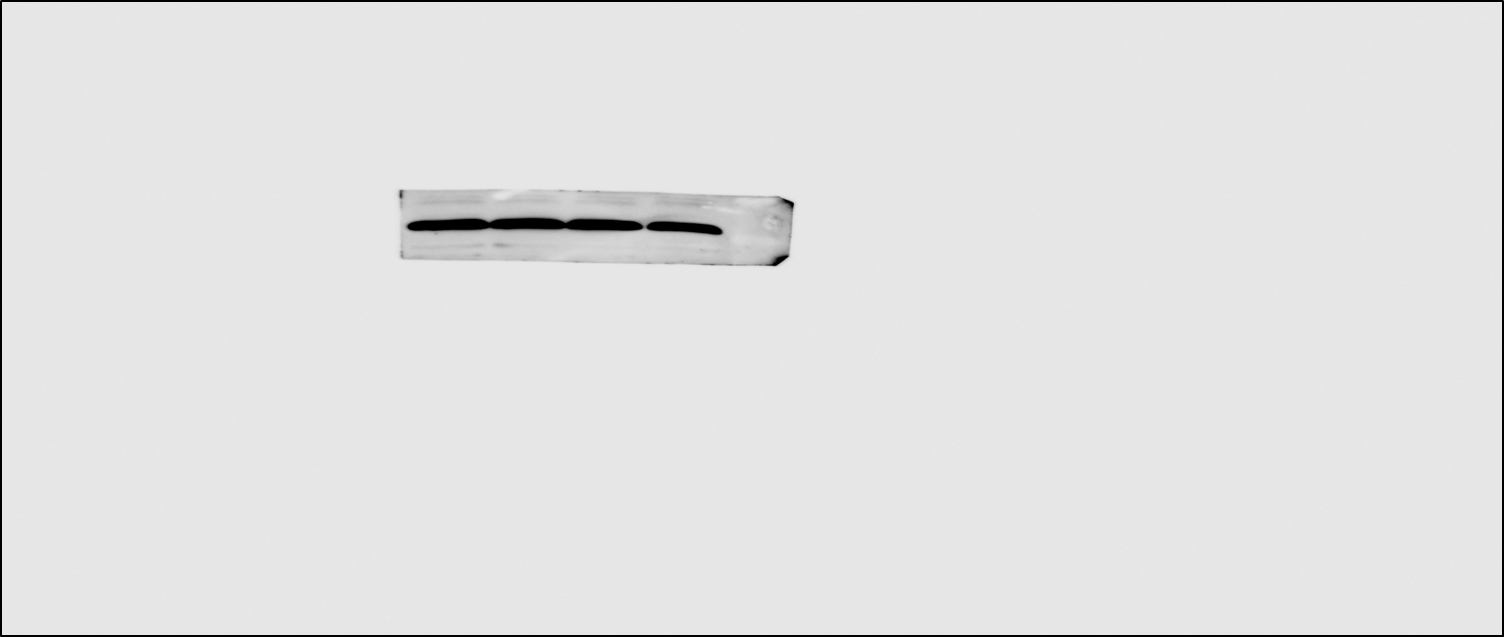


β-actin





Caspase-3

Cleaved-caspase-3





Cleaved-caspase-9

Caspase-9


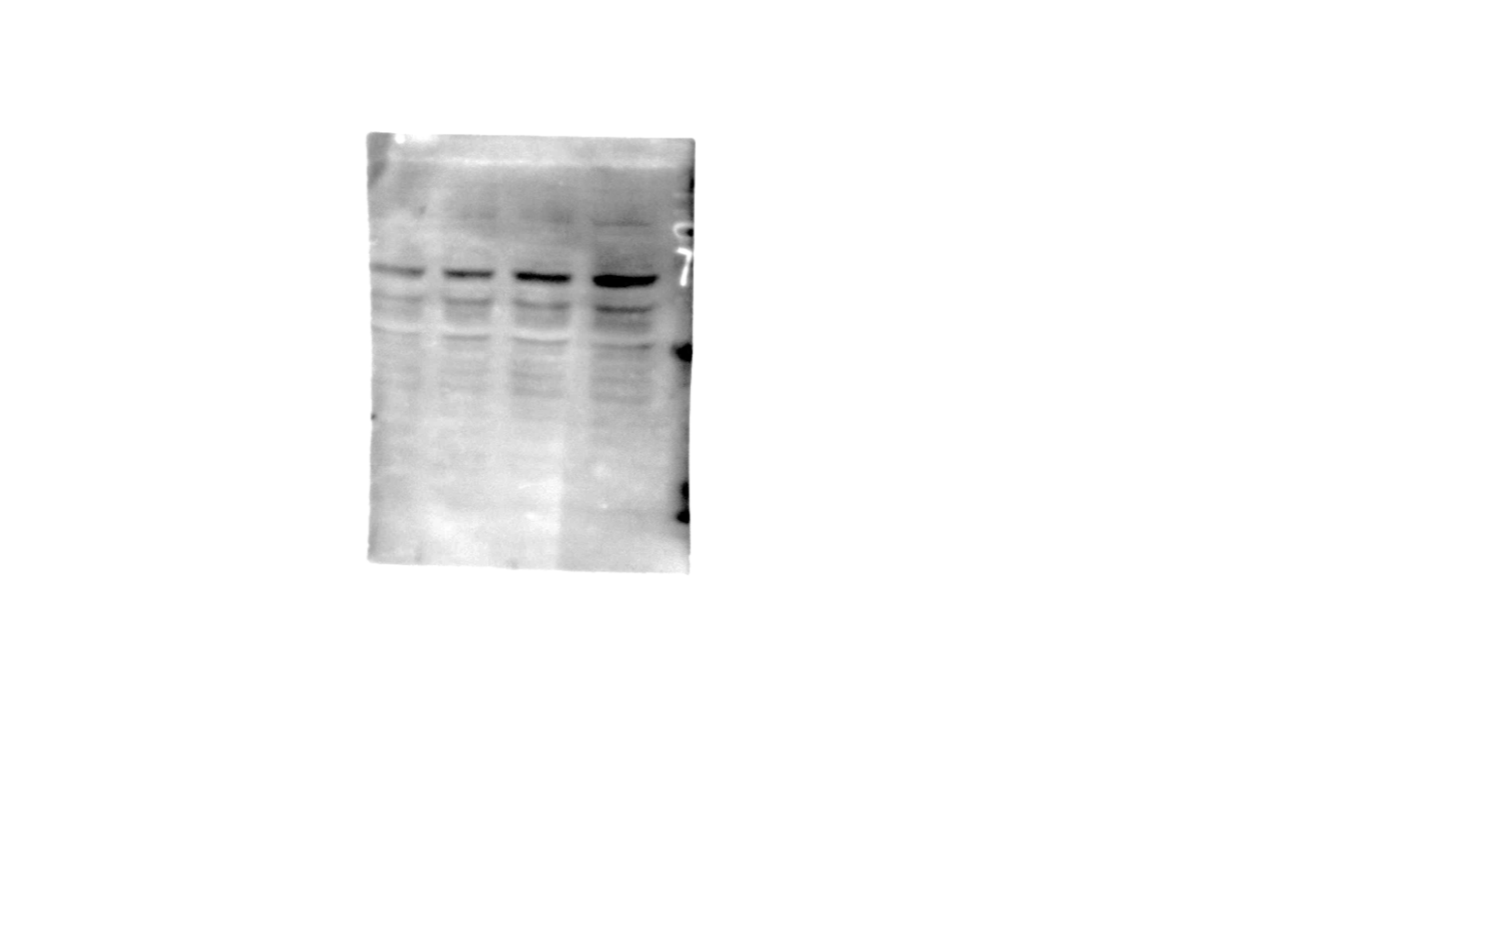


Cleaved-caspase-7

Caspase-7


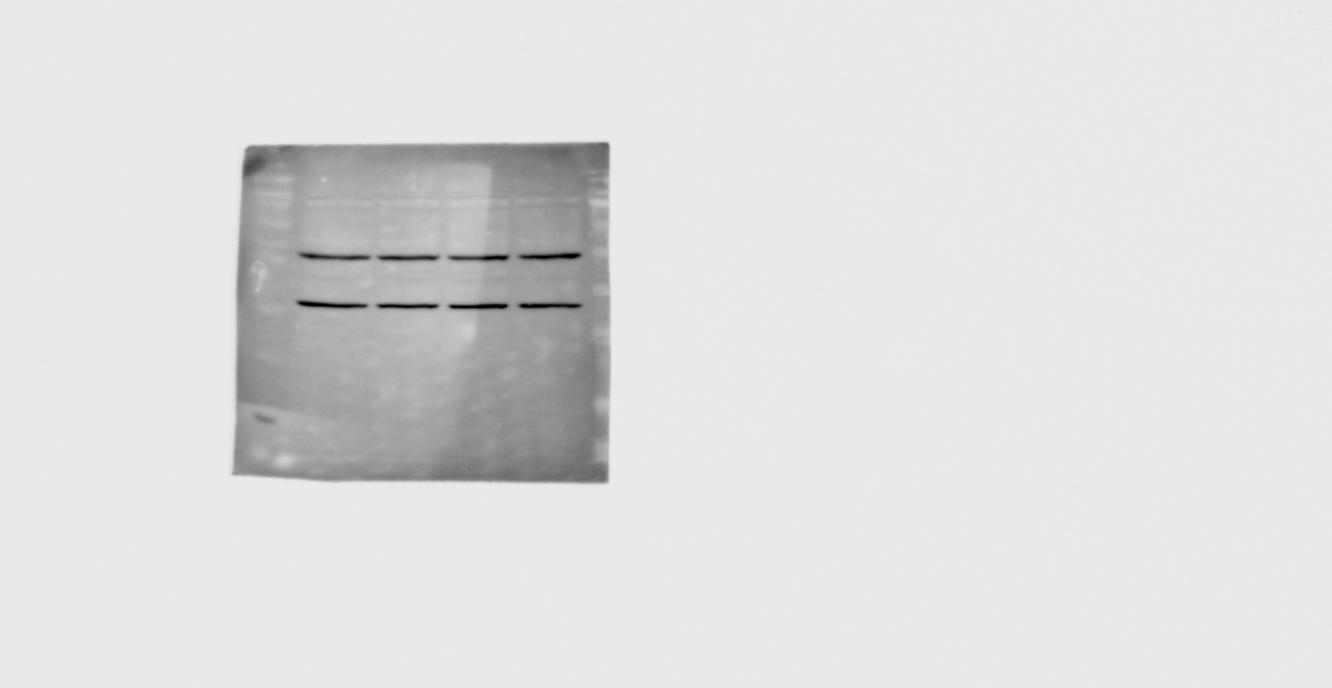


Cleaved-caspase-8

Caspase-8


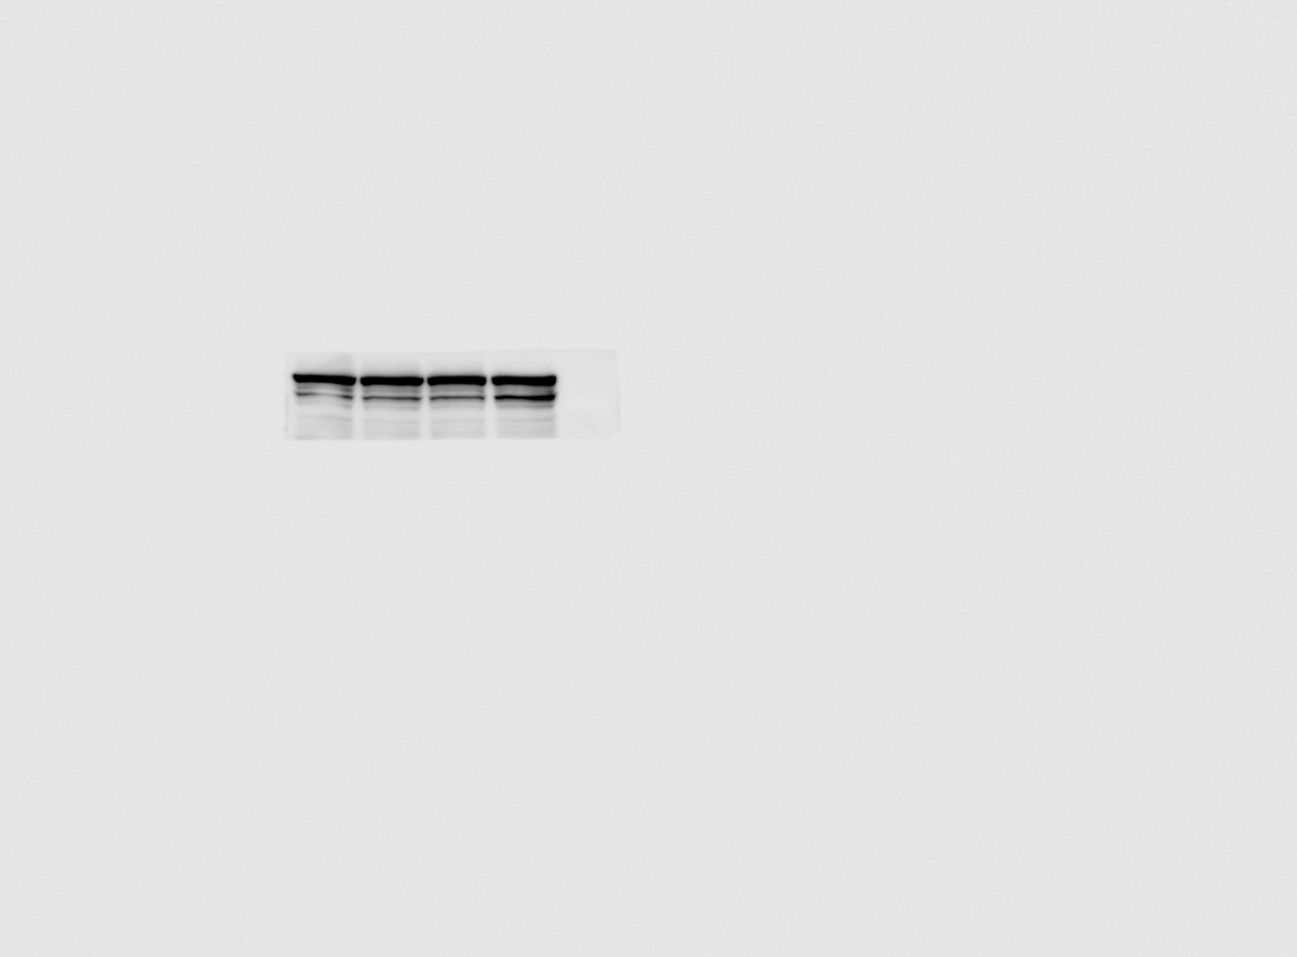


PARP

Cleaved-PARP

From left to right, HepG2 cells were treated with 0, 200, 400, 600 μg/mL.





β-actin


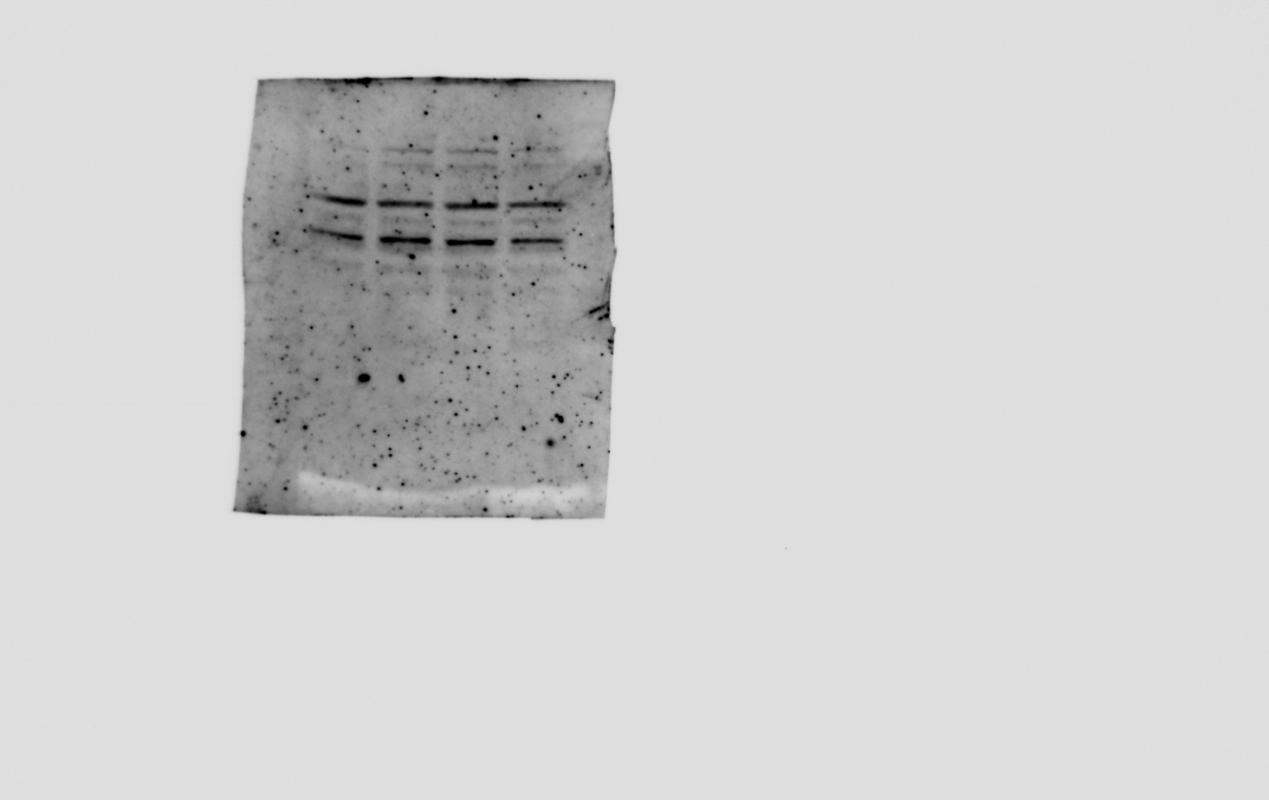


Cleaved-caspase-3

Caspase-3


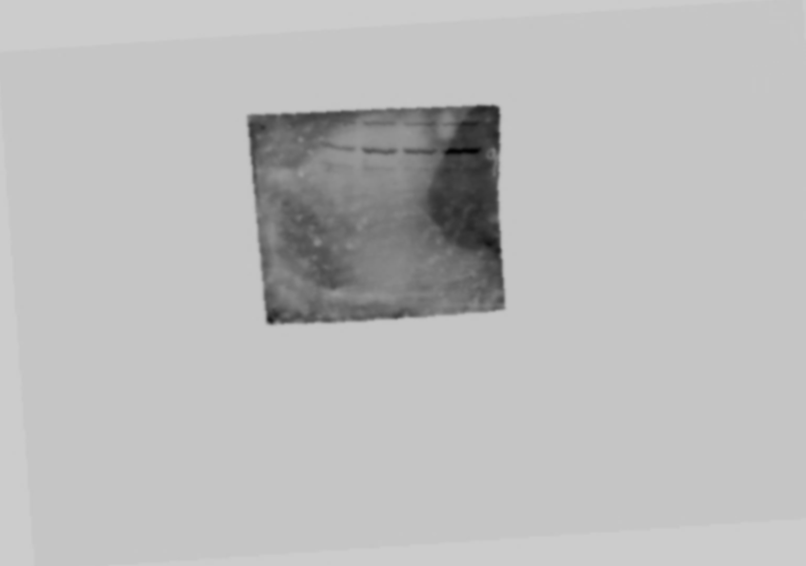


Caspase-9

Cleaved-caspase-9


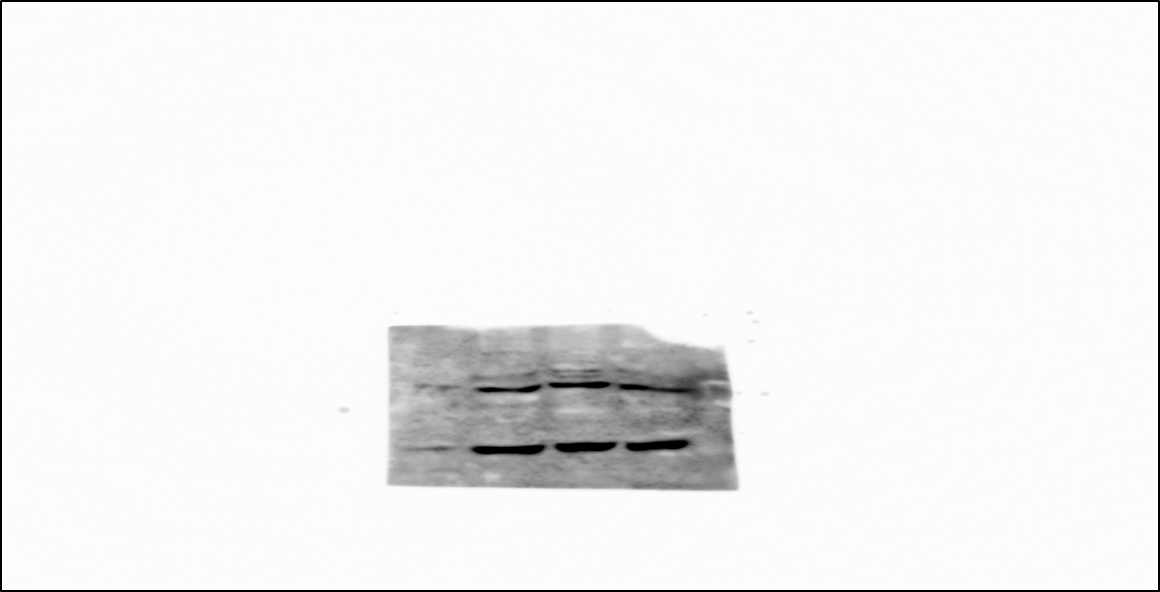


Cleaved-caspase-7

Caspase-7


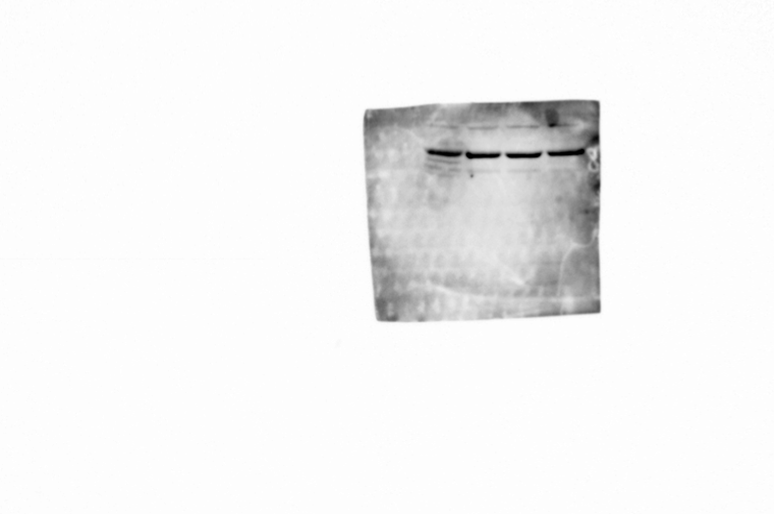


Caspase-8

Cleaved-caspase-8


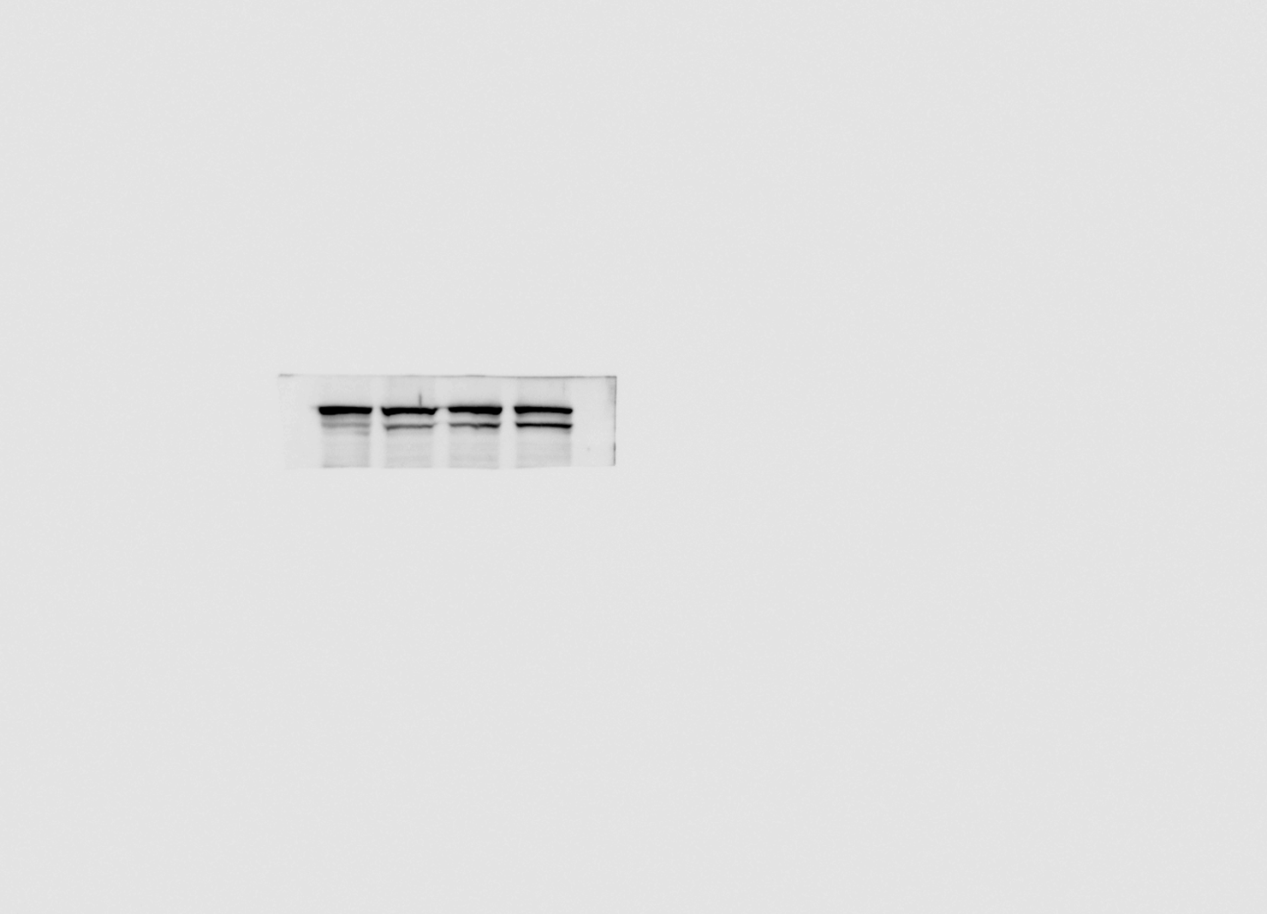


Cleaved-PARP

PARP

**Figure 6B.** HepG2 cells were treated with different concentrations (0, 200, 400, 600 μg/mL) of CTPG for 24 h.Proteins were isolated to detect the levels of MMP-2 and VEGF by Western blot.

From left to right, HepG2 cells were treated with 0, 200, 400, 600 μg/mL.


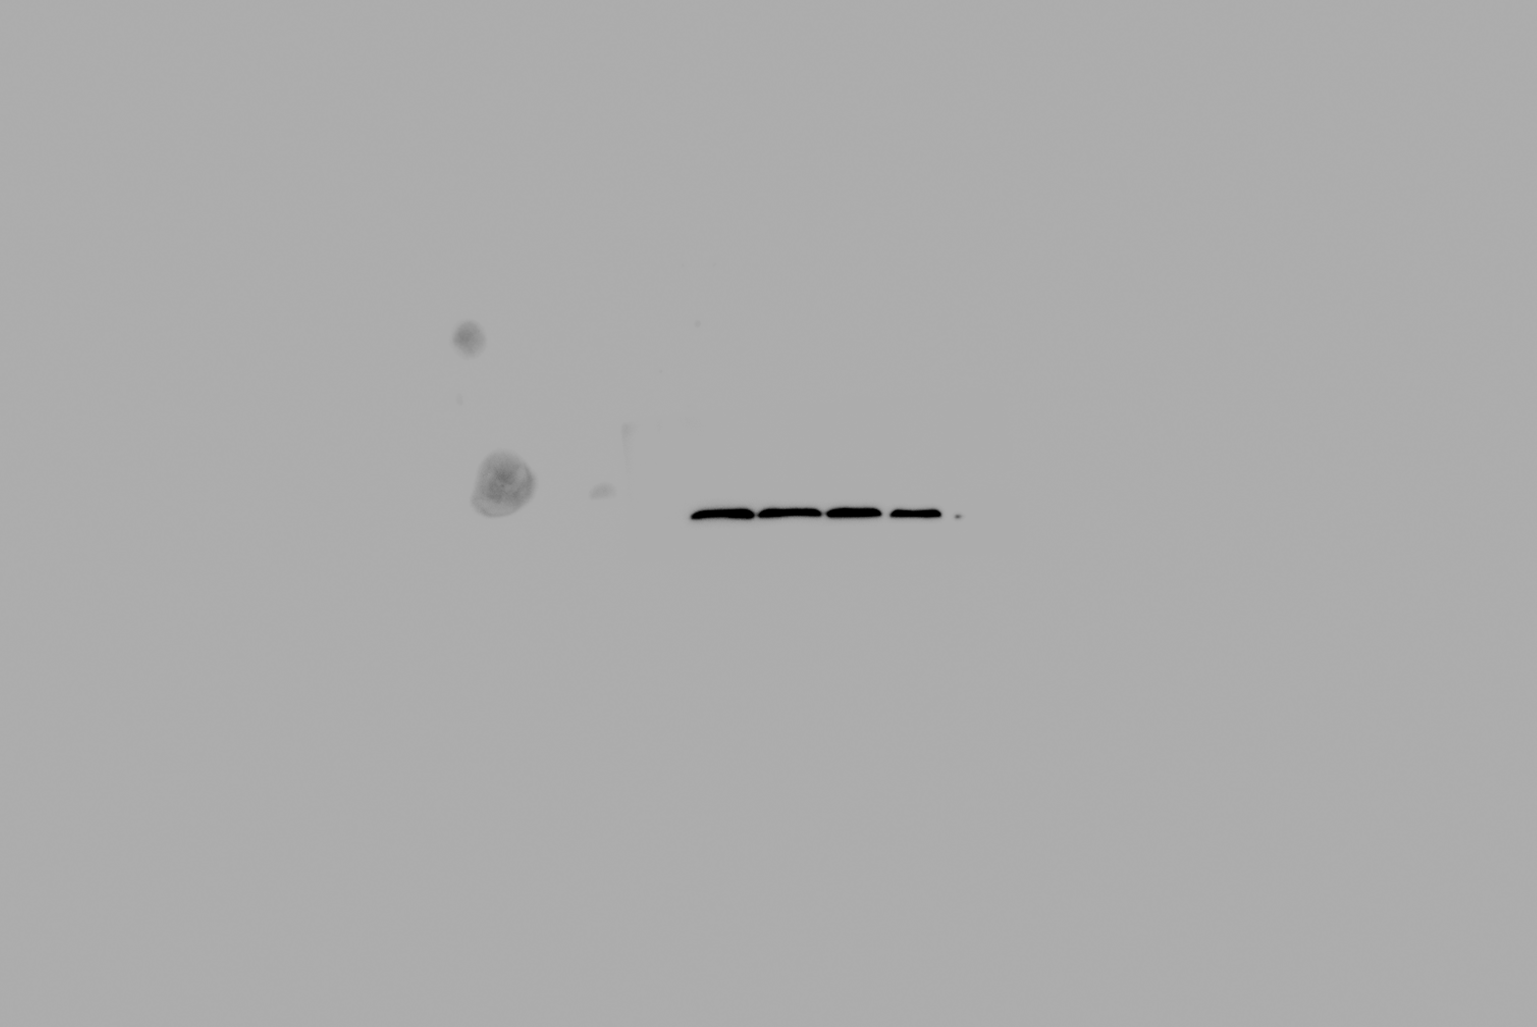


β-actin


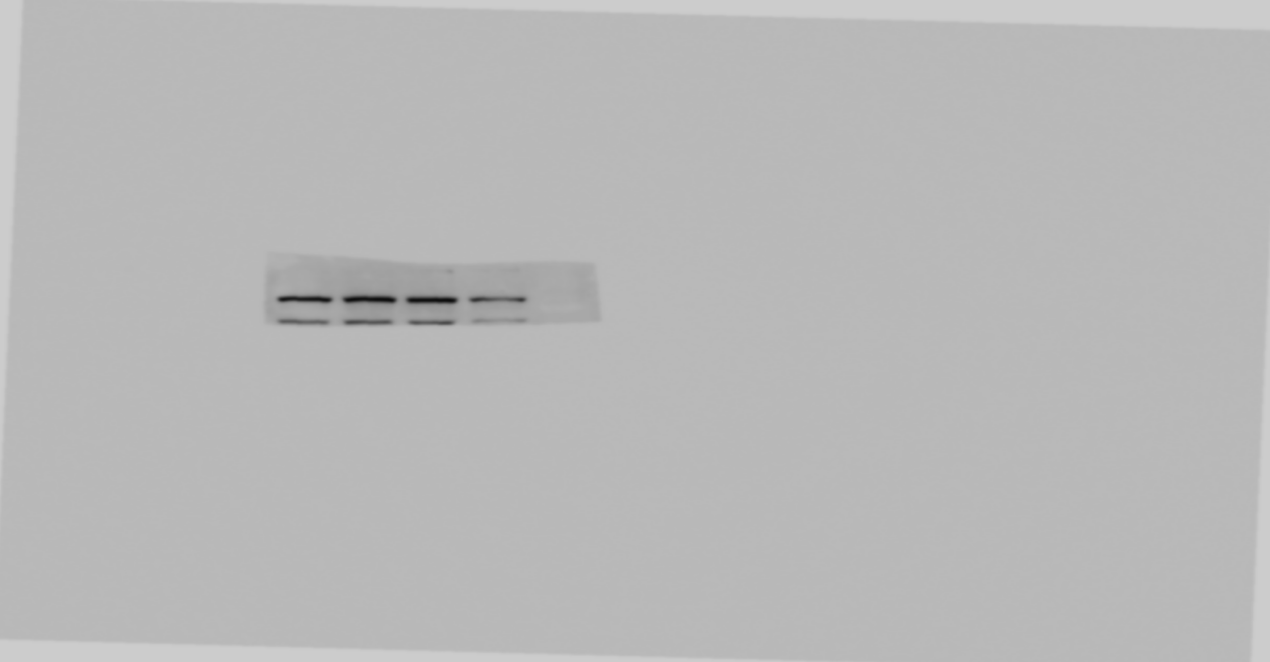


MMP-2


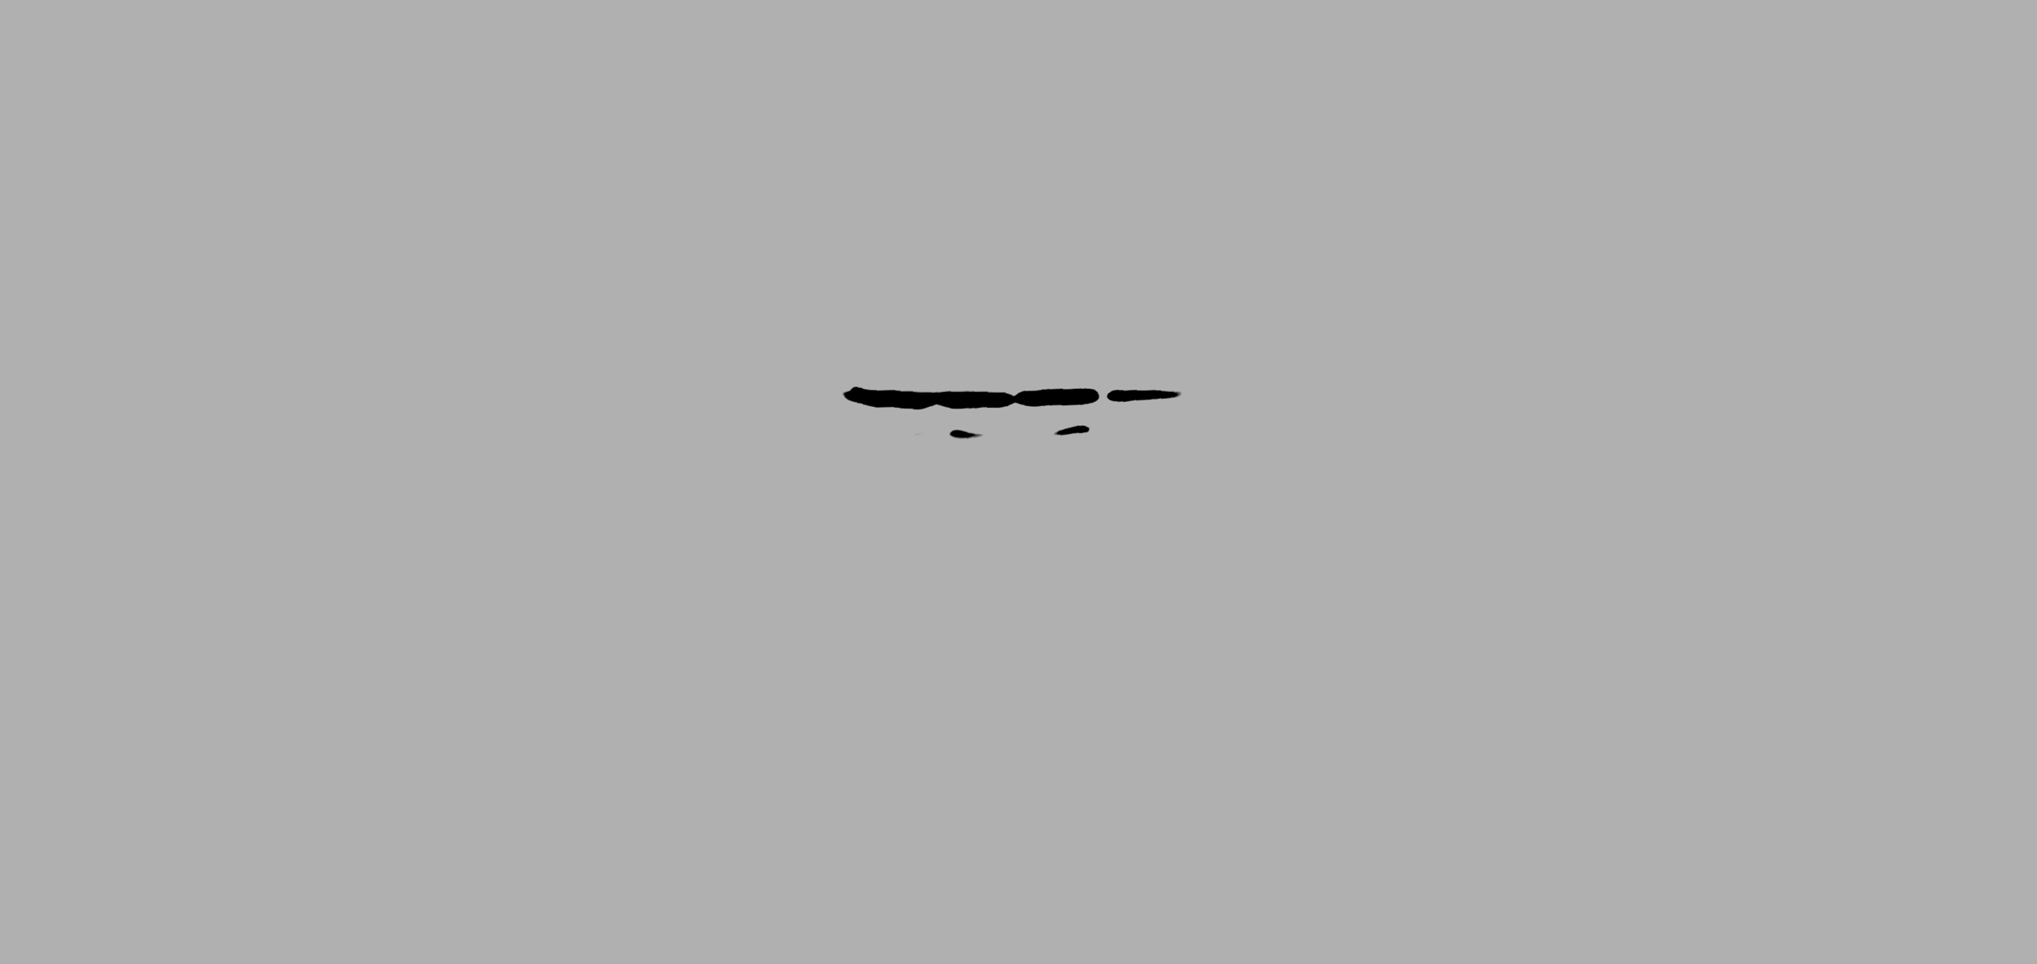


VEGF
